# Supplementary material
Source: Springer Nature journal article supplement (https://www.springermedizin.de/resource/supplementary/13058_2012_3245_MOESM1_ESM.pdf/9703590)

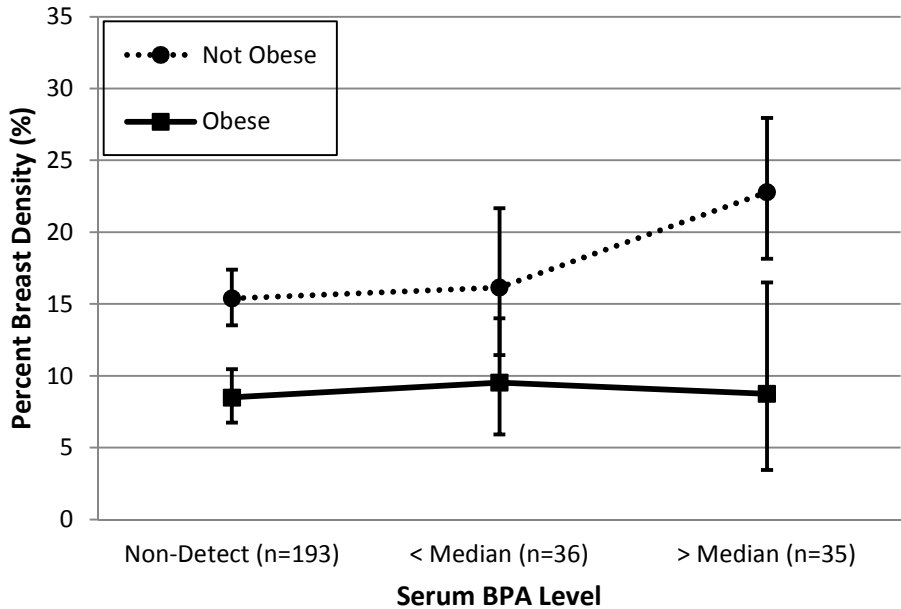

Supplement: MOESM1 [file 9703590]
